# Supplementary material for: Machine learning models of clinically relevant biomarkers for the prediction of stable obstructive coronary artery disease
Source: PubMed Central journal article supplement (PMC9343708; doi:10.3389/fcvm.2022.933803), 2022-07-19
Supplement: Data_Sheet_1.pdf [file Data_Sheet_1.pdf]

## *Supplementary Material*

**Supplementary Table S1.** Hyperparameters of Machine learning models

**Supplementary Table S2.** The classification performance in data with missing value imputation

**Supplementary Figure S1.** Feature importance ranking of all available variables

**Supplementary Table 1.** Hyperparameters of Machine learning models

|                       | <b>Hyper-parameter space</b>                                                                                                                                                                                                                                                                                                                                                                                  | <b>Best Combination of Hyperparameters</b>                                                                                                                                                                                                                                                                 |
|-----------------------|---------------------------------------------------------------------------------------------------------------------------------------------------------------------------------------------------------------------------------------------------------------------------------------------------------------------------------------------------------------------------------------------------------------|------------------------------------------------------------------------------------------------------------------------------------------------------------------------------------------------------------------------------------------------------------------------------------------------------------|
| <b>CatBoost</b>       | {'objective': ['CrossEntropy', 'LogLoss'],<br>'colsample_bylevel': 0.01~0.1, 'depth': [1, 2, 3, 4, 5, 6, 7, 8, 9, 10, 11, 12], 'boosting_type': ['Plain', 'Ordered'], 'bootstrap_type': ['Bernoulli', 'MVS']}                                                                                                                                                                                                 | {'objective': 'CrossEntropy', 'colsample_bylevel': 0.07204955354411087, 'depth': 5, 'boosting_type': 'Ordered', 'bootstrap_type': 'Bernoulli', 'subsample': 0.3304637109012857}                                                                                                                            |
| <b>XGBoost</b>        | {'booster': ["gbtree", "dart"],<br>'max_depth': [1, 2, 3, 4, 5, 6, 7, 8, 9],<br>'eta': 1e-8~1.0,<br>'gamma': 1e-8~1.0,<br>'grow_policy': ["depthwise", "lossguide"],<br>'min_child_weight', 1e-8~7,<br>'subsample': 0.5~1.0,<br>'colsample_bytree': 0.5~1.0,<br>'lambda': 1e-8~1.0,<br>'alpha': 1e-8~1.0}                                                                                                     | {'lambda': 0.37927981109329206, 'alpha': 0.9805763194814385, 'num_boost_round': 37, 'max_depth': 9, 'eta': 0.0014379045325768336, 'gamma': 0.18406078011313776, 'grow_policy': 'lossguide', 'min_child_weight': 5.267513277099358, 'subsample': 0.6856863780740691, 'colsample_bytree': 0.688088947036968} |
| <b>LightGBM</b>       | {'objective': ['regression', 'regression_l1', 'huber', 'fair', 'poisson', 'quantile', 'mape', 'gamma', 'tweedie', 'binary'],<br>'boosting_type': ['gbdt', 'rf', 'dart', 'goss'],<br>'feature_pre_filter': [True, False],<br>'lambda_l1': 0~1,<br>'lambda_l2': 0~1,<br>'num_leaves': 2~131072,<br>'feature_fraction': 0~1,<br>'bagging_fraction': 0~1,<br>'bagging_freq': 0~10,<br>'min_child_samples': 0~100} | {'objective': 'binary', 'metric': 'auc', 'verbosity': -1, 'boosting_type': 'gbdt', 'feature_pre_filter': False, 'lambda_l1': 6.0139982784366754, 'lambda_l2': 2.0015289857179124e-07, 'num_leaves': 6, 'feature_fraction': 0.8, 'bagging_fraction': 1.0, 'bagging_freq': 0, 'min_child_samples': 10}       |
| <b>Gradient Boost</b> | {'loss': ['deviance', 'exponential'],<br>'learning_rate': 1e-8~1,<br>'n_estimators': 100~5000,<br>'subsample': 0.5~1,<br>'criterion': ['squared_error', 'friedman_mse', 'mse', 'mae'],<br>'min_samples_split': 2~20,<br>'min_samples_leaf': 1~20,<br>'max_depth': 2~15}                                                                                                                                       | {'loss': 'deviance',<br>'learning_rate': 0.005001710593960871,<br>'n_estimators': 1900,<br>'subsample': 0.6346381848474243,<br>'criterion': 'squared_error', 'min_samples_split': 11,<br>'min_samples_leaf': 14,<br>'max_depth': 4}                                                                        |
| <b>Linear SVM</b>     | {'penalty': ['l1', 'l2'],<br>'loss': ['hinge', 'squared_hinge']}                                                                                                                                                                                                                                                                                                                                              | {'penalty': 'l2',<br>'loss': 'squared_hinge'}                                                                                                                                                                                                                                                              |
| <b>KNN</b>            | {'n_neighbors': [5, 10, 15],<br>'weights': ['uniform', 'distance']}                                                                                                                                                                                                                                                                                                                                           | {'n_neighbors': 10,<br>'weights': 'distance'}                                                                                                                                                                                                                                                              |
| <b>GBC</b>            | {'n_estimators': 100~3000,<br>'criterion': ['gini', 'entropy'],<br>'max_depth': 4~50,<br>'min_samples_split': 2~150,<br>'min_samples_leaf': 1~60,<br>'max_samples': 0.5~1}                                                                                                                                                                                                                                    | {'n_estimators': 1200,<br>'criterion': 'gini',<br>'max_depth': 15,<br>'min_samples_split': 12,<br>'min_samples_leaf': 2,<br>'max_samples': 0.980910966889412}                                                                                                                                              |

|            |                                                                                                                                                                   |                                                                                       |
|------------|-------------------------------------------------------------------------------------------------------------------------------------------------------------------|---------------------------------------------------------------------------------------|
| <b>MLP</b> | <pre>{'use_dropout': [True, False],<br/>'hidden_layer_sizes': [(58,), (116,), (174,),<br/>                        (232,)],<br/>'n_layers': [1, 2, 3, 4, 5]}</pre> | <pre>{'use_dropout': True,<br/>'hidden_layer_sizes': (174,),<br/>'n_layers': 2}</pre> |
|------------|-------------------------------------------------------------------------------------------------------------------------------------------------------------------|---------------------------------------------------------------------------------------|

Supplementary Material

**Supplementary Table S2.** The classification performance in data with missing value imputation

| Models   | AUROC        | MCC          | Accuracy     | Sensitivity  | Specificity  | PPV          | NPV          | F1           |
|----------|--------------|--------------|--------------|--------------|--------------|--------------|--------------|--------------|
| CatBoost | <b>0.791</b> | <b>0.428</b> | <b>0.739</b> | <b>0.783</b> | 0.652        | <b>0.815</b> | <b>0.606</b> | <b>0.799</b> |
| XGBoost  | 0.779        | 0.413        | 0.728        | 0.761        | <b>0.663</b> | <b>0.815</b> | 0.587        | 0.787        |
| LightGBM | 0.773        | 0.369        | 0.706        | 0.739        | 0.641        | 0.801        | 0.557        | 0.769        |

The bold values indicate the best performance of the 11 models.

AUROC = area under the receiver operating characteristics; GBM = gradient boosting machine; MCC = Matthews correlation coefficients; NPV = negative predictive value; PPV = positive predictive value; XG = extreme gradient.

**Supplementary Figure S1.** Feature importance ranking of all available variables.

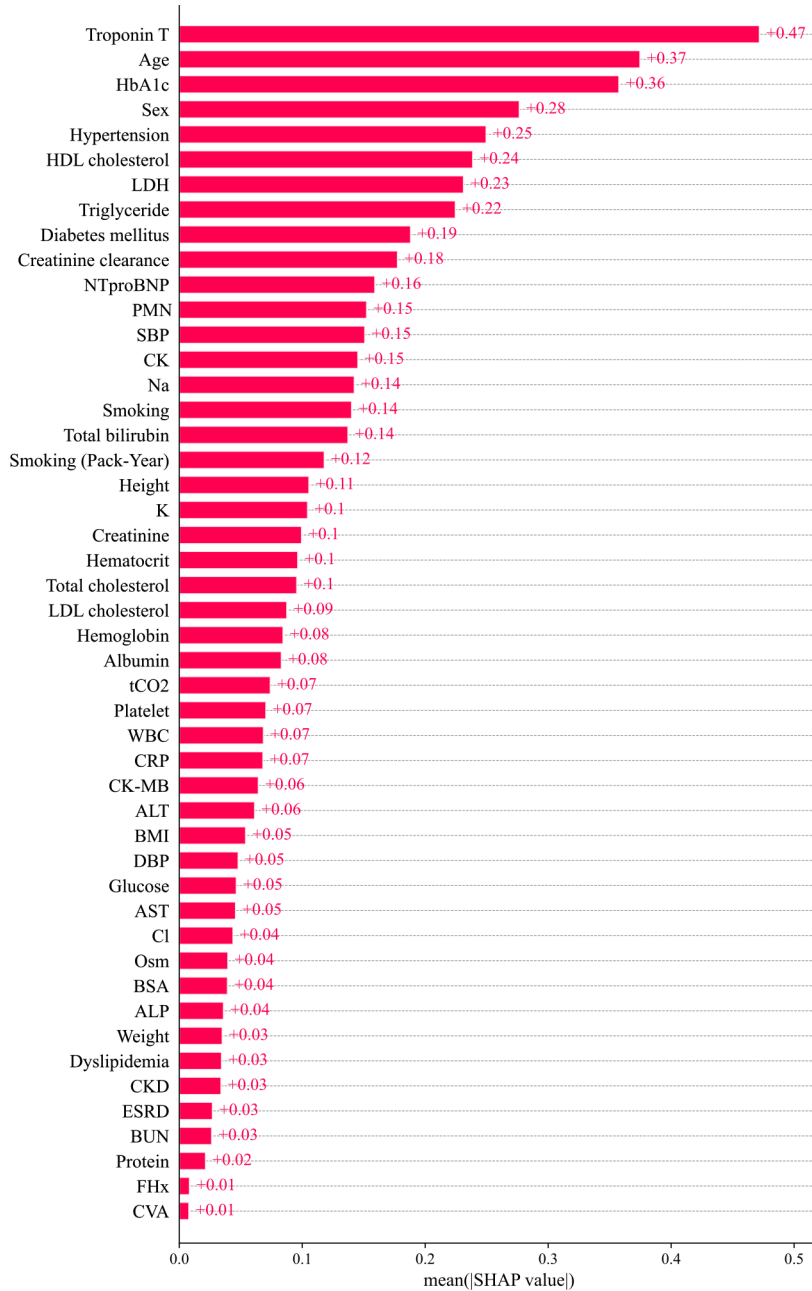

ALP = alkaline phosphatase; ALT = alanine aminotransferase; AST = aspartate aminotransferase; BMI = body mass index; BSA = body surface area; BUN = blood urea nitrogen; CK = creatine kinase; CK-MB = creatine kinase MB isoenzyme; CKD = chronic kidney disease; CRP = C-reactive protein; CVA = cerebrovascular accident; DBP = diastolic blood pressure; ESRD = end-stage renal disease; FHx = family history of atherosclerotic cardiovascular disease; HbA1c = hemoglobin A1c; HDL = high-density lipoprotein; LDH = lactate dehydrogenase; LDL = low-density lipoprotein; Osm = serum Osmolality; PMN = polymorphonuclear leukocyte; SBP = systolic blood pressure; SHAP = SHapley Additive exPlanations; tCO2 = Total CO2; Troponin T = high-sensitivity cardiac troponin T; WBC = White Blood cell
